# Supplementary material
Source: publisher site journal article supplement (http://kjim.org/upload/media/kjim-2019-039-suppl9.pdf)
Supplement: Supplementary file 1 [file kjim-2019-039-suppl9.pdf]

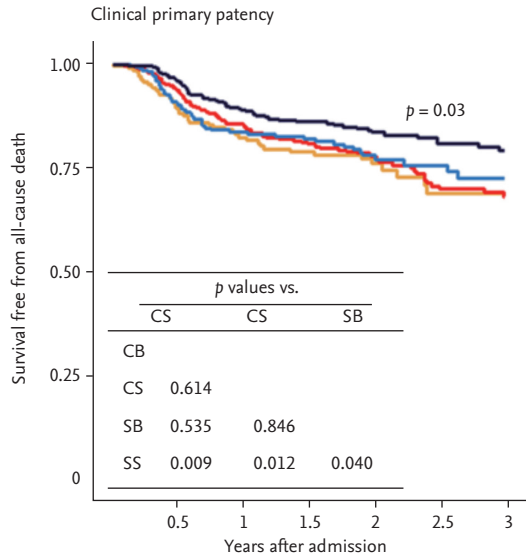

|    |     |     |     |    |
|----|-----|-----|-----|----|
| CB | 214 | 130 | 78  | 28 |
| CS | 465 | 279 | 180 | 72 |
| SB | 304 | 169 | 104 | 40 |
| SS | 406 | 271 | 165 | 98 |

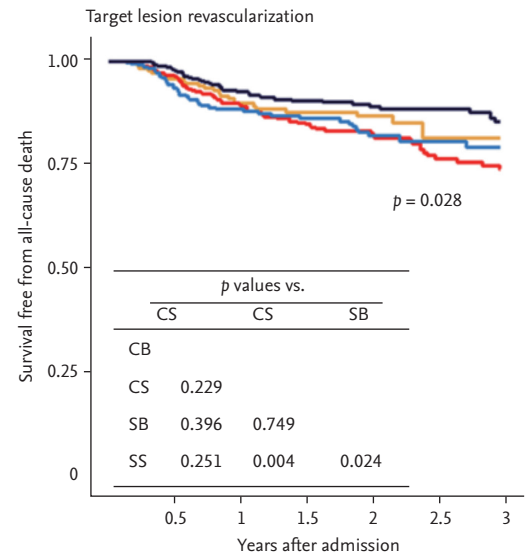

|    |     |     |     |     |
|----|-----|-----|-----|-----|
| CB | 214 | 141 | 88  | 35  |
| CS | 465 | 291 | 192 | 80  |
| SB | 304 | 177 | 111 | 48  |
| SS | 409 | 278 | 174 | 105 |

**A**

**B**

**Supplementary Figure 4.** Kaplan-Meier curves for outcomes in various subgroups: technical success only. (A) Clinical primary patency, (B) target lesion revascularization. CB, patient group with chronic total occlusion treated by plain balloon angioplasty; CS, patient group with chronic total occlusion treated by stenting; SB, patient group without chronic total occlusion treated by plain balloon angioplasty; SS, patient group without chronic total occlusion treated by stenting.
